# Supplementary material for: Development of a semi-parametric PAR (Photosynthetically Active Radiation) partitioning model for the United States, version 1.0
Source: Copernicus journal article supplement (doi:10.5194/gmd-7-2477-2014), 2014-10-24
Supplement: Supplementary file 1 [file supplement-cover-letter.pdf › supplement-cover-letter.pdf]

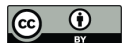

*Supplement of*

## **Development of a semi-parametric PAR (Photosynthetically Active Radiation) partitioning model for the United States, version 1.0**

**J. C. Kathilankal et al.**

*Correspondence to:* J. C. Kathilankal ([james.kathilankal@licor.com](mailto:james.kathilankal@licor.com))

- Supplement-Cover-Letter.pdf
- logdifpar.m
